# Supplementary material
Source: PubMed Central journal article supplement (PMC3439503)

**Supplementary Figure:** Dystrophin denaturant melt recorded at 1 and 10  $\mu\text{M}$  protein concentration indicating the absence of a dimer under our experimental conditions.

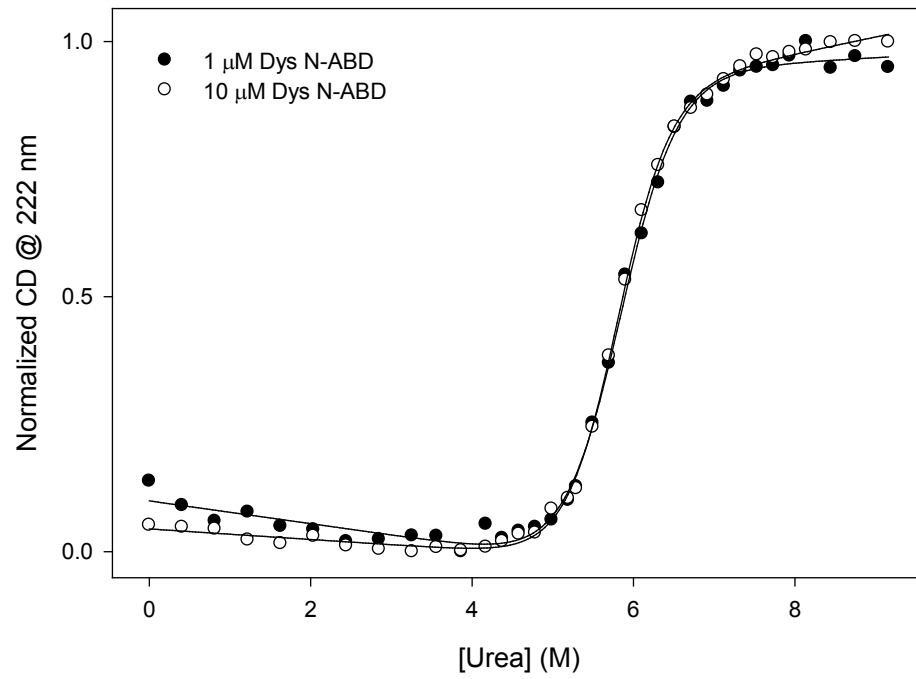

Supplement: NIHMS350312-supplement-Supp_Fig_S1.pdf [file NIHMS350312-supplement-Supp_Fig_S1.pdf]
