# Supplementary material
Source: PubMed Central journal article supplement (PMC3439503)
Supplement: NIHMS350312-supplement-Supp_Table_S1.pdf [file NIHMS350312-supplement-Supp_Table_S1.pdf]

**Supplementary Table: Intrinsic aggregation propensities of the amino acid sequences of the two polypeptide chains corresponding to utrophin and dystrophin N-ABDs, as predicted by various computational programs.**

| Computational Program | Dys N-ABD | Utr N-ABD |
|-----------------------|-----------|-----------|
| TANGO                 | 2100      | 2268      |
| AGGRESCAN             | -5.1      | -7.8      |
| Net-CSSP              | -7.9      | -8.0      |
| PASTA                 | -18.1     | -16.3     |
| Betascan              | -377      | -279      |
| FoldAmyloid           | 5209      | 5474      |
| Waltz                 | 4447      | 4686      |
